# Supplementary material for: Exploiting Natural Killer Cell Engagers to Control Pediatric B-cell Precursor Acute Lymphoblastic Leukemia
Source: PubMed Central journal article supplement (PMC9662914; doi:10.1158/2326-6066.cir-21-0843), 2022-03-03
Supplement: cir-21-0843_supplemental_cir-21-0843_suppst1-sf-7.pdf [file cir-21-0843_supplemental_cir-21-0843_suppst1-sf-7.pdf]

**Supplementary Table S1. Antibodies used in cytofluorimetric analysis**

| Specificity             | Fluorochrome | Clone     | Isotype | Amount/<br>sample | Catalog no. | Vendor                                       |
|-------------------------|--------------|-----------|---------|-------------------|-------------|----------------------------------------------|
| CD3                     | PE-CF594     | UCHT1     | IgG1    | 3 µL              | 562280      | BD Bioscience, San Jose, CA, USA             |
| CD3                     | BV510        | UCHT1     | IgG1    | 3 µL              | 563109      | BD Bioscience, San Jose, CA, USA             |
| CD19                    | PE-CF594     | HIB19     | IgG1    | 3 µL              | 562294      | BD Bioscience, San Jose, CA, USA             |
| CD16                    | FITC         | 3G8       | IgG1    | 3 µL              | 555406      | BD Bioscience, San Jose, CA, USA             |
| CD56                    | BV421        | NCAM 16.2 | IgG2b   | 1 µL              | 562751      | BD Bioscience, San Jose, CA, USA             |
| KIR2DL2/S2/L3           | FITC         | CHL       | IgG2b   | 4 µL              | 559784      | BD Bioscience, San Jose, CA, USA             |
| CD107a                  | FITC         | H4A3      | IgG1    | 5 µL              | 555800      | BD Bioscience, San Jose, CA, USA             |
| CD107a                  | PE           | H4A3      | IgG1    | 5 µL              | 555801      | BD Bioscience, San Jose, CA, USA             |
| IFN-γ                   | PE           | B27       | IgG1    | 0,5 µL            | 554701      | BD Bioscience, San Jose, CA, USA             |
| CD20                    | V450         | L27       | IgG1    | 3 µL              | 561164      | BD Bioscience, San Jose, CA, USA             |
| CD20                    | Unconjugated | L27       | IgG1    | 2,5 µg/mL         | 347670      | BD Bioscience, San Jose, CA, USA             |
| CD56                    | PE-Cy7       | N901      | IgG1    | 3 µL              | A21692      | Beckman Coulter, Brea, CA, USA               |
| KIR2DL1/S1, KIR2DL3*005 | PE           | EB6B      | IgG1    | 5 µL              | A09778      | Beckman Coulter, Brea, CA, USA               |
| KIR2DL1/S1, KIR2DL3*005 | PE-Cy7       | EB6B      | IgG1    | 3 µL              | A66899      | Beckman Coulter, Brea, CA, USA               |
| KIR2DL2/S2/L3           | PE-Cy7       | GL183     | IgG1    | 3 µL              | A66901      | Beckman Coulter, Brea, CA, USA               |
| NKG2A                   | APC          | Z199      | IgG2b   | 3 µL              | A60797      | Beckman Coulter, Brea, CA, USA               |
| TCR PAN γδ              | FITC         | IMMU510   | IgG1    | 5 µL              | B49175      | Beckman Coulter, Brea, CA, USA               |
| CD3                     | VioBlue      | BW264/56  | IgG2a   | 0,6 µL            | 130-113-133 | Miltenyi Biotech, Bergisch Gladbach, Germany |
| CD45                    | APC-Vio 770  | 5B1       | IgG2a   | 0,6 µL            | 130-113-115 | Miltenyi Biotech, Bergisch Gladbach, Germany |
| NKp46 (CD335)           | PE           | 9E2       | IgG1    | 3 µL              | 130-092-607 | Miltenyi Biotech, Bergisch Gladbach, Germany |
| KIR3DL1                 | FITC         | DX9       | IgG1    | 0,4 µL            | 130-123-668 | Miltenyi Biotech, Bergisch Gladbach, Germany |
| KIR3DL1                 | PE-Vio 770   | DX9       | IgG1    | 2 µL              | 130-099-959 | Miltenyi Biotech, Bergisch Gladbach, Germany |
| KIR2DL1, 2DS5           | PE           | 143211    | IgG1    | 5 µL              | FAB1844P    | R&D systems, Minneapolis, MN, USA            |

|                 |                 |         |       |         |            |                                |
|-----------------|-----------------|---------|-------|---------|------------|--------------------------------|
| Granzyme B      | Alexa Fluor 647 | GB11    | IgG1  | 2 µL    | 515406     | Biolegend, San Diego, CA, USA  |
| Isotype control | Alexa Fluor 647 | MOPC-21 | IgG1  | 2 µL    | 400136     | Biolegend, San Diego, CA, USA  |
| NKp30 (CD337)   | Alexa Fluor 647 | P30-15  | IgG1  | 3 µL    | 325212     | Biolegend, San Diego, CA, USA  |
| Perforin        | PE              | δG9     | IgG2b | 1 µL    | 358-050    | Ancell, Stillwater, MN, USA    |
| Isotype control | PE              | BPC 4   | IgG2b | 1 µL    | 284-050    | Ancell, Stillwater, MN, USA    |
| CD19            | PE-Cy7          | SJ25C1  | IgG1  | 3 µL    | 25-0198-42 | Thermo Fisher, Waltham MA, USA |
| HLA class I     | Unconjugated    | W6/32   | IgG2a | 2 µg/mL |            | Our Laboratory                 |
| CD19            | Unconjugated    | BU19    | IgG1  | 2 µg/mL |            | Our Laboratory                 |

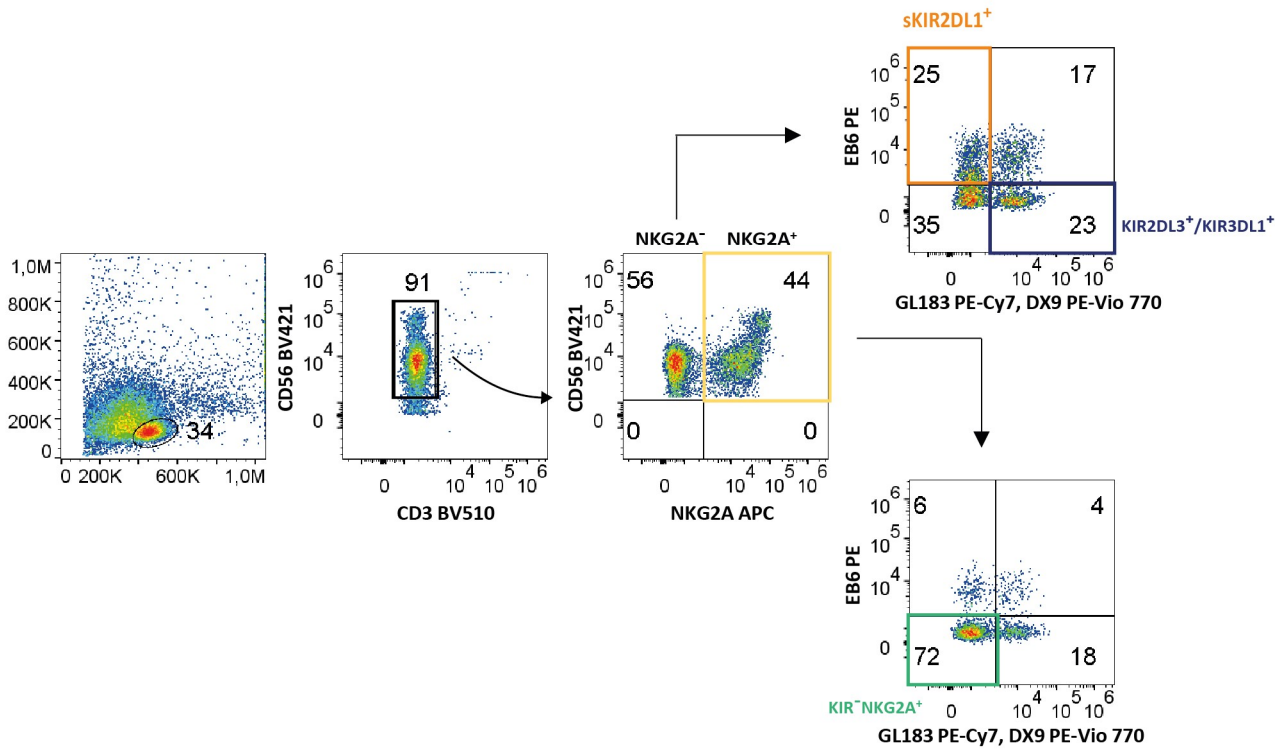

**Supplementary Figure S1. Gating strategy to define NK cell subsets in degranulation assay.** Purified NK cells from donors characterized by an *A/A KIR* genotype were stained with the following mAb combination to identify sKIR2DL1<sup>+</sup> (orange), KIR2DL3<sup>+</sup>/KIR3DL1<sup>+</sup> (blue), and KIR<sup>-</sup>NKG2A<sup>+</sup> (green) NK cell subsets: CD3-BV510, CD56-BV421, NKG2A-APC, EB6- or 143211-PE, GL183-PE-Cy7, DX9-PE-Vio 770 and CD107a-FITC. In some experiments, the mAb combination was modified using CD107a-PE, and, consequently, EB6-PE-Cy7, CHL- and DX9-FITC were used.

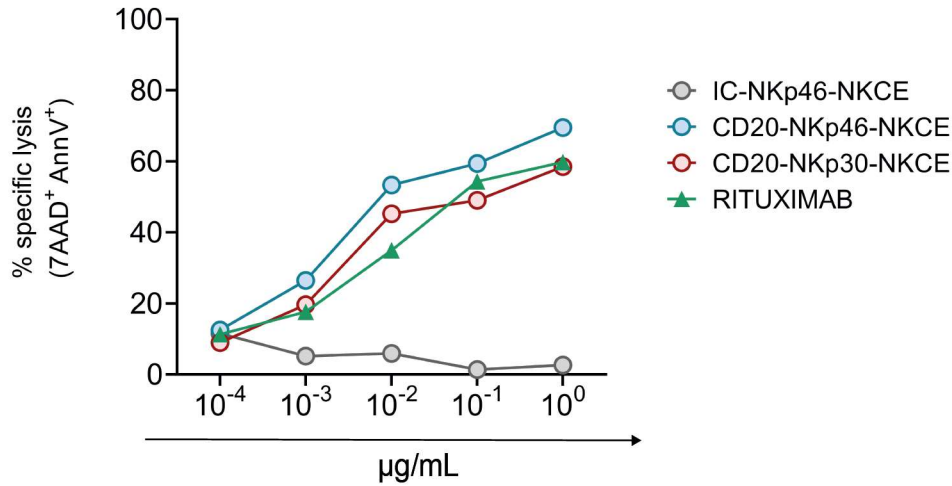

**Supplementary Figure S2. Cytotoxicity assay based on 7AAD/AnnV staining presents similar results to <sup>51</sup>Cr-release assay (reported in Fig. 1B).** Resting NK cells from a representative healthy donor were tested against MHH-CALL-4 using different concentrations of CD20-NKCEs or rituximab. E:T ratio 10:1.

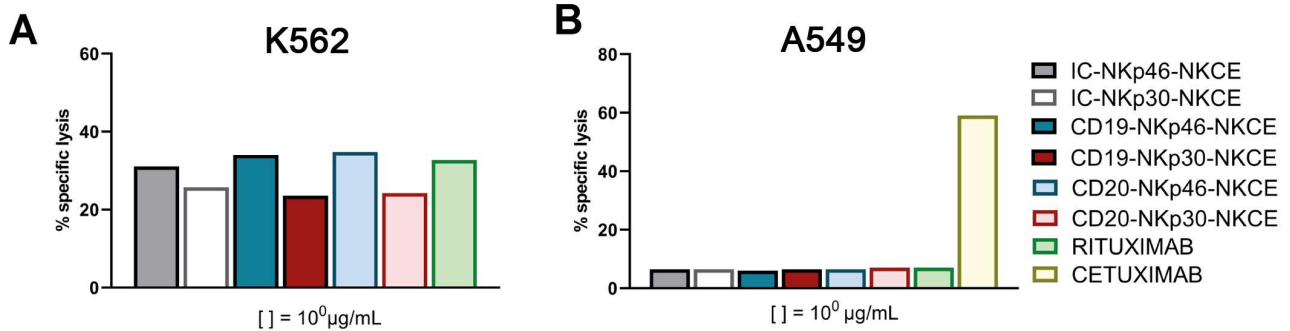

**Supplementary Figure S3. CD19- and CD20-NKCEs do not enhance the killing of CD19<sup>-</sup> and CD20<sup>-</sup> cell lines: K562 (A) and A549 (B).** E:T ratio 10:1 (K562) and 5:1 (A549). Results from a representative donor are shown.

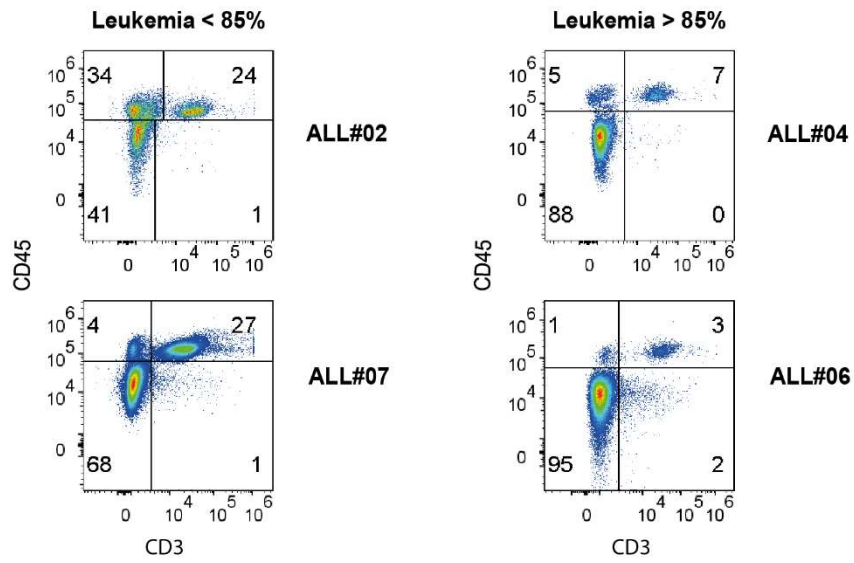

**Supplementary Figure S4. Analysis of CD45 and CD3 expression on samples obtained from four leukemia patients at disease onset. CD3<sup>+</sup> cells, which are all CD45<sup>bright</sup>, represent the healthy counterpart. Numbers indicate the percentage of cells in each quadrant.**

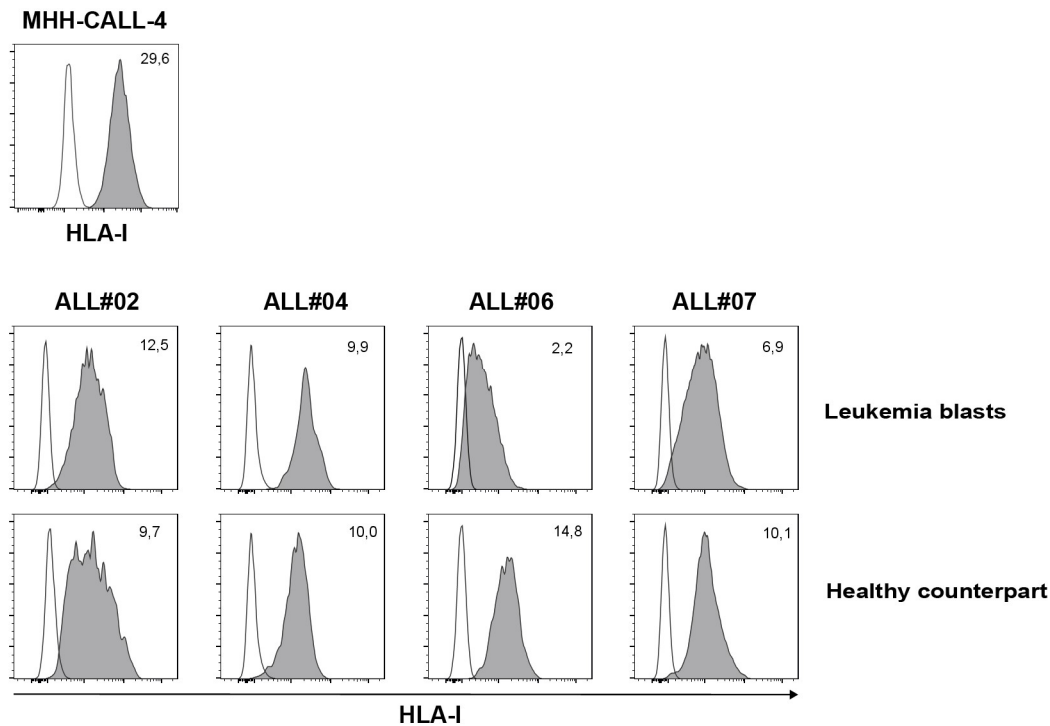

**Supplementary Figure S5. Analysis of HLA class I (HLA-I) expression on MHH-CALL-4 cell line and samples obtained from four leukemia patients at disease onset.** Immunofluorescence was performed using W6/32 mAb in combination with anti-IgG FITC secondary reagent (gray histograms). Negative controls with the secondary reagent were also performed (white histograms). The expression of HLA-I on leukemia blasts (CD45<sup>dim</sup>) is compared to the healthy counterpart (CD45<sup>bright</sup>) by an appropriate gating strategy. Numbers indicate the staining index (SI).

**A**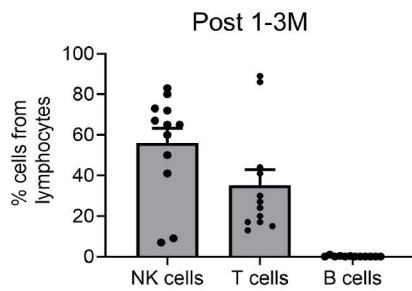**B**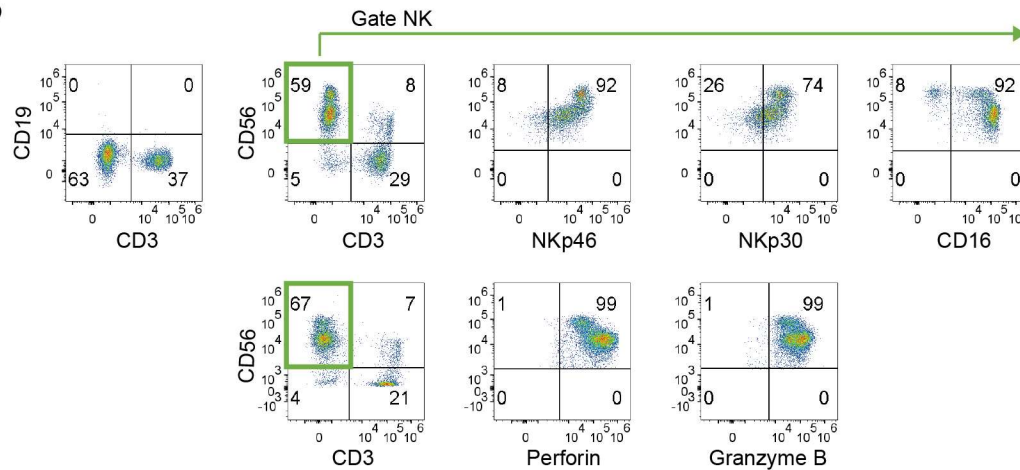

**Supplementary Figure S6. Immunological reconstitution in patients at early time points after  $\alpha\beta$ T/B-depleted haplo-HSCT. A)** % of NK cells ( $CD3^-CD56^+$ ) T cells ( $CD3^+CD56^-$ ), and B cells ( $CD19^+CD3^-$ ) in patients at 1 or 3 months after haplo-HSCT (Post 1-3M). **B)** Representative flow cytometry analysis of PBMC of a patient (post-3M): identification of different lymphocyte subsets, and characterization of either surface expression of NKp46, NKp30, and CD16, or intracellular staining of perforin and granzyme B on NK cells (gating on  $CD3^-CD56^+$ ). The following mAb combinations were used: i) CD19-PE-CF594, CD3-VioBlue, CD56-PE-Cy7, NKp46-PE, NKp30-Alexa Fluor 647, and CD16-FITC; ii) CD3-PE-CF594, CD56-BV421, perforin-PE, and granzyme B-Alexa Fluor 647. Numbers indicate the percentage of cells in each quadrant.

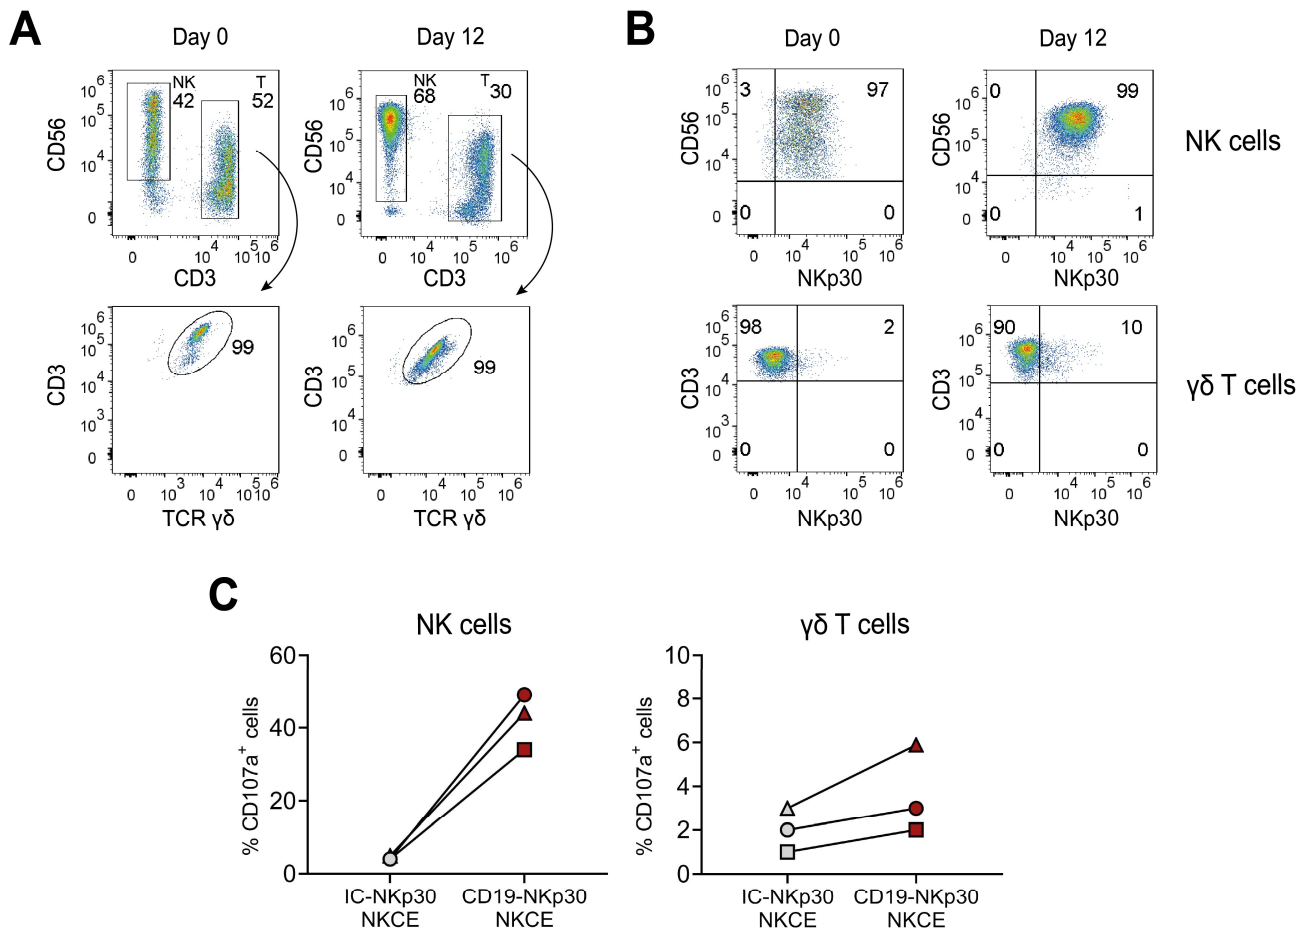

**Supplementary Figure S7. Effect of CD19-NKp30-NKCE on  $\gamma\delta$  T cells.** **A-B)** Flow cytometry analyses performed on PBMC either freshly isolated (day 0) or cultured 12 days with IL-15 at 10 ng/mL (day 12) in a representative patient at 1 month after haplo-HSCT. **A)** % of NK cells ( $CD3^-CD56^+$ ) and T cells ( $CD3^+$ ) of lymphocytes at day 0 and day 12.  $\gamma\delta$  T cells were identified gating on  $CD3^+$  cells and represented the totality of the  $CD3^+$  population (lower panels). The mAb combination was: CD3-PE-CF594, CD56-PE-Cy7, and TCR PAN  $\gamma\delta$ -FITC. **B)** Analysis of NKp30 expression on NK cells ( $CD3^-CD56^+$ ) and  $\gamma\delta$  T cells ( $CD3^+$ ) at day 0 and day 12. The mAb combination was: CD3-PE-CF594, CD56-PE-Cy7, TCR PAN  $\gamma\delta$ -FITC, and NKp30-Alexa Fluor 647. In the staining of samples at day 12, we also used Live/Dead Fixable Aqua stain to exclude dead cells. Numbers indicate the percentage of cells in each gate. **C)** CD107a degranulation assay of IL-15 cultured (day 12) NK cells or  $\gamma\delta$  T cells from three transplanted patients against MHH-CALL-4 in the presence of the indicated NKCEs at  $10^0$   $\mu$ g/mL. NK cells were identified gating on  $CD3^-CD56^+$  cells, whereas  $\gamma\delta$  T cells gating on  $CD3^+$  TCR  $\gamma\delta^+$  cells. The triangle corresponds to the representative patient shown in panels A and B.
